# Supplementary material for: The modified German subjective vitality scale (SVS-GM): Psychometric properties and application in daily life
Source: PubMed Central journal article supplement (PMC9374102; doi:10.3389/fpsyg.2022.948906), 2022-07-29
Supplement: Table_2.pdf [file Table_2.pdf]

## Supplementary Material 2

### 1 Correlation Coefficients between Measures from Study 1

**Supplementary Table 2**

*Means (M), standard deviations (SD), and Pearson product-moment correlation coefficients between the SVS-GM3, SVS-GM1, and ROF*

| Variable | M           | SD   | 1    | 2                      | 3                      | 4                      | 5                      | 6                      | 7                      | 8                   |                     |
|----------|-------------|------|------|------------------------|------------------------|------------------------|------------------------|------------------------|------------------------|---------------------|---------------------|
| SVS-GM3  | past (1)    | 6.32 | 2.25 |                        |                        |                        |                        |                        |                        |                     |                     |
|          | present (2) | 6.00 | 2.35 | .68**<br>[.59, .75]    |                        |                        |                        |                        |                        |                     |                     |
|          | future (3)  | 7.02 | 2.15 | .59**<br>[.49, .68]    | .63**<br>[.54, .71]    |                        |                        |                        |                        |                     |                     |
| SVS-GM1  | past (4)    | 6.02 | 2.41 | .84**<br>[.79, .88]    | .60**<br>[.50, .68]    | .51**<br>[.39, .61]    |                        |                        |                        |                     |                     |
|          | present (5) | 5.95 | 2.47 | .57**<br>[.46, .66]    | .79**<br>[.73, .84]    | .52**<br>[.41, .62]    | .65**<br>[.55, .72]    |                        |                        |                     |                     |
|          | future (6)  | 6.68 | 2.31 | .54**<br>[.43, .64]    | .61**<br>[.52, .70]    | .80**<br>[.74, .85]    | .54**<br>[.43, .63]    | .58**<br>[.47, .67]    |                        |                     |                     |
| ROF      | past (7)    | 4.37 | 2.33 | -.59**<br>[-.68, -.49] | -.35**<br>[-.47, -.21] | -.31**<br>[-.44, -.17] | -.59**<br>[-.68, -.48] | -.36**<br>[-.48, -.23] | -.33**<br>[-.45, -.19] |                     |                     |
|          | present (8) | 4.07 | 2.63 | -.30**<br>[-.43, -.16] | -.51**<br>[-.61, -.40] | -.23**<br>[-.36, -.09] | -.29**<br>[-.42, -.15] | -.52**<br>[-.62, -.41] | -.33**<br>[-.45, -.19] | .44**<br>[.32, .55] |                     |
|          | future (9)  | 3.86 | 2.54 | -.29**<br>[-.41, -.15] | -.30**<br>[-.43, -.17] | -.39**<br>[-.51, -.26] | -.26**<br>[-.39, -.12] | -.29**<br>[-.41, -.15] | -.43**<br>[-.54, -.30] | .46**<br>[.34, .57] | .46**<br>[.33, .56] |

*Note.*  $N = 183$

Values in square brackets indicate the 95% confidence interval for each correlation. The confidence interval is a plausible range of population correlations that could have caused the sample correlation (Cumming, 2014). \* indicates  $p < .05$ . \*\* indicates  $p < .01$ .

SVS-GM3 = 3-item modified German Subjective Vitality Scale, SVS-GM1 = 1-item modified German Subjective Vitality Scale, ROF = Rate of Fatigue.

**Supplementary Table 3**

Means (*M*), standard deviations (*SD*), and Pearson product-moment correlation coefficients between the SVS-GM3, SVS-GM1, PA, NA and SWLS

| Variable | <i>M</i>     | <i>SD</i> | 1    | 2      | 3      | 4      | 5      | 6      | 7      | 8      | 9      | 10     | 11    | 12    | 13 | 14 |
|----------|--------------|-----------|------|--------|--------|--------|--------|--------|--------|--------|--------|--------|-------|-------|----|----|
| SVS-GM3  | past (1)     | 6.19      | 2.23 |        |        |        |        |        |        |        |        |        |       |       |    |    |
|          | present (2)  | 5.89      | 2.39 | .70**  |        |        |        |        |        |        |        |        |       |       |    |    |
|          | future (3)   | 7.04      | 2.13 | .69**  | .62**  |        |        |        |        |        |        |        |       |       |    |    |
| SVS-GM1  | past (4)     | 5.89      | 2.34 | .80**  | .60**  | .58**  |        |        |        |        |        |        |       |       |    |    |
|          | present (5)  | 5.73      | 2.53 | .54**  | .74**  | .52**  | .65**  |        |        |        |        |        |       |       |    |    |
|          | future (6)   | 6.78      | 2.29 | .63**  | .63**  | .79**  | .63**  | .61**  |        |        |        |        |       |       |    |    |
| PA       | past (7)     | 3.24      | 0.65 | .70**  | .53**  | .55**  | .71**  | .50**  | .45**  |        |        |        |       |       |    |    |
|          | present (8)  | 2.81      | 0.83 | .48**  | .67**  | .48**  | .56**  | .72**  | .51**  | .64**  |        |        |       |       |    |    |
|          | future (9)   | 3.45      | 0.67 | .45**  | .43**  | .67**  | .47**  | .49**  | .59**  | .64**  | .64**  |        |       |       |    |    |
| NA       | past (10)    | 1.94      | 0.58 | -.47** | -.33** | -.37** | -.39** | -.26** | -.29** | -.31** | -.26** | -.23** |       |       |    |    |
|          | present (11) | 1.45      | 0.51 | -.24** | -.22** | -.30** | -.23** | -.21*  | -.19*  | -.17*  | -.09   | -.20*  | .68** |       |    |    |
|          | future (12)  | 1.60      | 0.54 | -.37** | -.30** | -.47** | -.32** | -.25** | -.42** | -.22** | -.28** | -.40** | .65** | .53** |    |    |

|      |              |       |      |                     |                     |                     |                     |                     |                     |                     |                     |                     |                        |                        |                        |                     |                     |  |
|------|--------------|-------|------|---------------------|---------------------|---------------------|---------------------|---------------------|---------------------|---------------------|---------------------|---------------------|------------------------|------------------------|------------------------|---------------------|---------------------|--|
| SWLS | past (13)    | 23.58 | 5.81 | .64**<br>[.53, .73] | .47**<br>[.34, .59] | .52**<br>[.39, .63] | .61**<br>[.49, .70] | .37**<br>[.22, .50] | .40**<br>[.25, .53] | .60**<br>[.48, .69] | .38**<br>[.23, .51] | .35**<br>[.20, .49] | -.48**<br>[-.60, -.35] | -.23**<br>[-.38, -.07] | -.26**<br>[-.41, -.10] |                     |                     |  |
|      | present (14) | 24.53 | 5.85 | .53**<br>[.40, .64] | .49**<br>[.36, .61] | .47**<br>[.33, .59] | .48**<br>[.35, .60] | .41**<br>[.26, .53] | .36**<br>[.21, .49] | .47**<br>[.33, .59] | .42**<br>[.27, .55] | .34**<br>[.19, .48] | -.47**<br>[-.59, -.33] | -.33**<br>[-.47, -.18] | -.28**<br>[-.42, -.12] | .84**<br>[.79, .89] |                     |  |
|      | future (15)  | 25.17 | 5.29 | .44**<br>[.30, .56] | .42**<br>[.28, .55] | .55**<br>[.42, .65] | .40**<br>[.25, .53] | .32**<br>[.16, .46] | .46**<br>[.32, .58] | .44**<br>[.29, .56] | .33**<br>[.17, .47] | .42**<br>[.27, .55] | -.43**<br>[-.56, -.29] | -.30**<br>[-.44, -.14] | -.45**<br>[-.57, -.30] | .72**<br>[.63, .79] | .76**<br>[.67, .82] |  |

Note.  $N = 143$

Values in square brackets indicate the 95% confidence interval for each correlation. The confidence interval is a plausible range of population correlations that could have caused the sample correlation (Cumming, 2014). \* indicates  $p < .05$ . \*\* indicates  $p < .01$ .

SVS-GM3 = 3-item modified German Subjective Vitality Scale, SVS-GM1 = 1-item modified German Subjective Vitality Scale, PA = Positive Affect, NA = Negative Affect, SWLS = Satisfaction with Life Scale.

**Supplementary Table 4**

Means (*M*), standard deviations (*SD*), and Pearson product-moment correlation coefficients between the SVS-GM3, SVS-GM1, SWE, and LOT-R

| Variable |             | <i>M</i> | <i>SD</i> | 1                   | 2                   | 3                   | 4                   | 5                   | 6                   | 7                   |
|----------|-------------|----------|-----------|---------------------|---------------------|---------------------|---------------------|---------------------|---------------------|---------------------|
| SVS-GM3  | past (1)    | 6.31     | 2.19      |                     |                     |                     |                     |                     |                     |                     |
|          | present (2) | 6.14     | 2.14      | .62**<br>[.49, .73] |                     |                     |                     |                     |                     |                     |
|          | future (3)  | 6.82     | 2.11      | .50**<br>[.34, .64] | .65**<br>[.52, .75] |                     |                     |                     |                     |                     |
| SVS-GM1  | past (4)    | 6.12     | 2.41      | .92**<br>[.88, .95] | .61**<br>[.48, .72] | .52**<br>[.36, .65] |                     |                     |                     |                     |
|          | present (5) | 6.14     | 2.34      | .57**<br>[.42, .69] | .88**<br>[.83, .92] | .60**<br>[.46, .71] | .59**<br>[.45, .71] |                     |                     |                     |
|          | future (6)  | 6.63     | 2.26      | .45**<br>[.28, .60] | .57**<br>[.42, .69] | .88**<br>[.83, .92] | .49**<br>[.32, .62] | .57**<br>[.42, .69] |                     |                     |
| SWE      | trait (7)   | 30.11    | 3.64      | .51**<br>[.34, .64] | .50**<br>[.34, .64] | .44**<br>[.27, .59] | .50**<br>[.33, .63] | .45**<br>[.28, .59] | .44**<br>[.26, .58] |                     |
| LOT-R    | trait (8)   | 22.56    | 3.62      | .40**<br>[.22, .55] | .26**<br>[.07, .43] | .37**<br>[.19, .53] | .36**<br>[.17, .52] | .17<br>[-.03, .35]  | .37**<br>[.19, .53] | .47**<br>[.30, .61] |

Note. *N* = 100

Values in square brackets indicate the 95% confidence interval for each correlation. The confidence interval is a plausible range of population correlations that could have caused the sample correlation (Cumming, 2014). \* indicates  $p < .05$ . \*\* indicates  $p < .01$ .

SVS-GM3 = 3-item modified German Subjective Vitality Scale, SVS-GM1 = 1-item modified German Subjective Vitality Scale, SWE = perceived self-efficacy, LOT-R = revised Life-Orientation Test.
